# Supplementary material for: YAP silencing by RB1 mutation is essential for small-cell lung cancer metastasis
Source: Springer Nature journal article supplement (doi:10.1038/s41467-023-41585-z), 2023-09-22
Supplement: MOESM10 [file 41467_2023_41585_MOESM10_ESM.pdf]

Corresponding author(s): Kun-liang Guan

Last updated by author(s): Aug 14, 2023

## Reporting Summary

Nature Portfolio wishes to improve the reproducibility of the work that we publish. This form provides structure for consistency and transparency in reporting. For further information on Nature Portfolio policies, see our [Editorial Policies](#) and the [Editorial Policy Checklist](#).

### Statistics

For all statistical analyses, confirm that the following items are present in the figure legend, table legend, main text, or Methods section.

n/a Confirmed

- |                                     |                                     |                                                                                                                                                                                                                                                            |
|-------------------------------------|-------------------------------------|------------------------------------------------------------------------------------------------------------------------------------------------------------------------------------------------------------------------------------------------------------|
| <input type="checkbox"/>            | <input checked="" type="checkbox"/> | The exact sample size ( $n$ ) for each experimental group/condition, given as a discrete number and unit of measurement                                                                                                                                    |
| <input type="checkbox"/>            | <input checked="" type="checkbox"/> | A statement on whether measurements were taken from distinct samples or whether the same sample was measured repeatedly                                                                                                                                    |
| <input type="checkbox"/>            | <input checked="" type="checkbox"/> | The statistical test(s) used AND whether they are one- or two-sided<br><i>Only common tests should be described solely by name; describe more complex techniques in the Methods section.</i>                                                               |
| <input checked="" type="checkbox"/> | <input type="checkbox"/>            | A description of all covariates tested                                                                                                                                                                                                                     |
| <input checked="" type="checkbox"/> | <input type="checkbox"/>            | A description of any assumptions or corrections, such as tests of normality and adjustment for multiple comparisons                                                                                                                                        |
| <input type="checkbox"/>            | <input checked="" type="checkbox"/> | A full description of the statistical parameters including central tendency (e.g. means) or other basic estimates (e.g. regression coefficient) AND variation (e.g. standard deviation) or associated estimates of uncertainty (e.g. confidence intervals) |
| <input checked="" type="checkbox"/> | <input type="checkbox"/>            | For null hypothesis testing, the test statistic (e.g. $F$ , $t$ , $r$ ) with confidence intervals, effect sizes, degrees of freedom and $P$ value noted<br><i>Give <math>P</math> values as exact values whenever suitable.</i>                            |
| <input checked="" type="checkbox"/> | <input type="checkbox"/>            | For Bayesian analysis, information on the choice of priors and Markov chain Monte Carlo settings                                                                                                                                                           |
| <input checked="" type="checkbox"/> | <input type="checkbox"/>            | For hierarchical and complex designs, identification of the appropriate level for tests and full reporting of outcomes                                                                                                                                     |
| <input checked="" type="checkbox"/> | <input type="checkbox"/>            | Estimates of effect sizes (e.g. Cohen's $d$ , Pearson's $r$ ), indicating how they were calculated                                                                                                                                                         |

Our web collection on [statistics for biologists](#) contains articles on many of the points above.

### Software and code

Policy information about [availability of computer code](#)

|                 |                                                                                                                                                                                                                                                                                    |
|-----------------|------------------------------------------------------------------------------------------------------------------------------------------------------------------------------------------------------------------------------------------------------------------------------------|
| Data collection | The collection of microscopic statistical data were performed using Image J (v1.53); Microscopy image were captured using Nikon Element; Flow cytometry data were performed using FACSDiva(v9.0). All software used in this study are either commercially available or open source |
| Data analysis   | All statistical graphs were performed using the Graph Pad Prism software (v5.00), Flow cytometry data were analyzed using FlowJo (v10.6.1), All software used in this study are either commercially available or open source                                                       |

For manuscripts utilizing custom algorithms or software that are central to the research but not yet described in published literature, software must be made available to editors and reviewers. We strongly encourage code deposition in a community repository (e.g. GitHub). See the Nature Portfolio [guidelines for submitting code & software](#) for further information.

### Data

Policy information about [availability of data](#)

All manuscripts must include a [data availability statement](#). This statement should provide the following information, where applicable:

- Accession codes, unique identifiers, or web links for publicly available datasets
- A description of any restrictions on data availability
- For clinical datasets or third party data, please ensure that the statement adheres to our [policy](#)

he authors declare that all data supporting the findings of this study are available within the article and its Supplementary Information files, or from the

## Research involving human participants, their data, or biological material

Policy information about studies with [human participants or human data](#). See also policy information about [sex, gender \(identity/presentation\), and sexual orientation](#) and [race, ethnicity and racism](#).

|                                                                    |                   |
|--------------------------------------------------------------------|-------------------|
| Reporting on sex and gender                                        | Nothing to report |
| Reporting on race, ethnicity, or other socially relevant groupings | Nothing to report |
| Population characteristics                                         | Nothing to report |
| Recruitment                                                        | Nothing to report |
| Ethics oversight                                                   | Nothing to report |

Note that full information on the approval of the study protocol must also be provided in the manuscript.

## Field-specific reporting

Please select the one below that is the best fit for your research. If you are not sure, read the appropriate sections before making your selection.

☒ Life sciences      ☐ Behavioural & social sciences      ☐ Ecological, evolutionary & environmental sciences

For a reference copy of the document with all sections, see [nature.com/documents/nr-reporting-summary-flat.pdf](https://www.nature.com/documents/nr-reporting-summary-flat.pdf)

## Life sciences study design

All studies must disclose on these points even when the disclosure is negative.

|                 |                                                                                                                                                                                                                                                                       |
|-----------------|-----------------------------------------------------------------------------------------------------------------------------------------------------------------------------------------------------------------------------------------------------------------------|
| Sample size     | Sufficient sample sizes were chosen for each experiment to determine whether the outcome was statistically significant. At least two independent transgenic lines were used for every relevant study, and at least three repetitions were performed for every studies |
| Data exclusions | No data were excluded from this study.                                                                                                                                                                                                                                |
| Replication     | We confirmed that all studies performed here is reproducible in all replications.                                                                                                                                                                                     |
| Randomization   | Experimental samples were selected randomly during the experiment without any pre-judgment.                                                                                                                                                                           |
| Blinding        | Blinding was not implemented in this study.                                                                                                                                                                                                                           |

## Reporting for specific materials, systems and methods

We require information from authors about some types of materials, experimental systems and methods used in many studies. Here, indicate whether each material, system or method listed is relevant to your study. If you are not sure if a list item applies to your research, read the appropriate section before selecting a response.

## Materials &amp; experimental systems

|                                     |                                                                 |
|-------------------------------------|-----------------------------------------------------------------|
| n/a                                 | Involved in the study                                           |
| <input type="checkbox"/>            | <input checked="" type="checkbox"/> Antibodies                  |
| <input type="checkbox"/>            | <input checked="" type="checkbox"/> Eukaryotic cell lines       |
| <input checked="" type="checkbox"/> | <input type="checkbox"/> Palaeontology and archaeology          |
| <input type="checkbox"/>            | <input checked="" type="checkbox"/> Animals and other organisms |
| <input checked="" type="checkbox"/> | <input type="checkbox"/> Clinical data                          |
| <input checked="" type="checkbox"/> | <input type="checkbox"/> Dual use research of concern           |
| <input checked="" type="checkbox"/> | <input type="checkbox"/> Plants                                 |

## Methods

|                                     |                                                    |
|-------------------------------------|----------------------------------------------------|
| n/a                                 | Involved in the study                              |
| <input checked="" type="checkbox"/> | <input type="checkbox"/> ChIP-seq                  |
| <input type="checkbox"/>            | <input checked="" type="checkbox"/> Flow cytometry |
| <input checked="" type="checkbox"/> | <input type="checkbox"/> MRI-based neuroimaging    |

## Antibodies

|                 |                                                                                                                                                                                                                                                                                                                                                                                                                                                                                                                                                                                                      |
|-----------------|------------------------------------------------------------------------------------------------------------------------------------------------------------------------------------------------------------------------------------------------------------------------------------------------------------------------------------------------------------------------------------------------------------------------------------------------------------------------------------------------------------------------------------------------------------------------------------------------------|
| Antibodies used | ASCL1 (Abcam, #ab211327), INSM1 (Abcam, #ab170876), E2F7 (Abcam, ab245655), RB1 (Abcam, ab181616), SYP (Santa Cruz, #sc-17750), RCOR1 (Santa Cruz, #sc-376567), CCN1 (Santa Cruz, #sc-374129), CCN2 (Santa Cruz, #sc-365970), YAP/TAZ (Santa Cruz, #sc-101199), P53 (Santa Cruz, #sc-126), E2F1 (Santa Cruz, #sc-251), GAPDH (Santa Cruz, #sc-47724), LATS1 (Cell signaling, #3477), LATS2 (Cell signaling, #5888), p-LATS (Cell signaling, #8654), H3 (Cell signaling, #4499), H3K27ac (Cell signaling, #8173), H3K4me3 (Cell signaling, #9751), VIN (Cell signaling, #13901), Flag (Sigma, #1804), |
| Validation      | All commercial antibodies were validated by the suppliers.                                                                                                                                                                                                                                                                                                                                                                                                                                                                                                                                           |

## Eukaryotic cell lines

Policy information about [cell lines and Sex and Gender in Research](#)

|                                                                      |                                                                                                                                                                                                                              |
|----------------------------------------------------------------------|------------------------------------------------------------------------------------------------------------------------------------------------------------------------------------------------------------------------------|
| Cell line source(s)                                                  | NCI-H526 [H526] is a SCLC cell line that was isolated from the lungs of a 55-year-old, White male with carcinoma. NCI-H69 [H69] is a SCLC cell line from a 55 year white male, NCI-H209 is a SCLC cell line from white male. |
| Authentication                                                       | STR assay were performed for authentication                                                                                                                                                                                  |
| Mycoplasma contamination                                             | we confirm all cell lines are mycoplasma negative                                                                                                                                                                            |
| Commonly misidentified lines<br>(See <a href="#">ICLAC</a> register) | None                                                                                                                                                                                                                         |

## Animals and other research organisms

Policy information about [studies involving animals](#); [ARRIVE guidelines](#) recommended for reporting animal research, and [Sex and Gender in Research](#)

|                         |                                                                                                         |
|-------------------------|---------------------------------------------------------------------------------------------------------|
| Laboratory animals      | Nude mice, Foxn1nu                                                                                      |
| Wild animals            | This study didn't involve wild animals.                                                                 |
| Reporting on sex        | All nude mice used in this study are male.                                                              |
| Field-collected samples | the study didn't involve samples collected from field.                                                  |
| Ethics oversight        | Approval was granted by Animal Experimental Ethical Inspection of Laboratory Centre at Fudan University |

Note that full information on the approval of the study protocol must also be provided in the manuscript.

## Flow Cytometry

## Plots

Confirm that:

- ☒ The axis labels state the marker and fluorochrome used (e.g. CD4-FITC).
- ☐ The axis scales are clearly visible. Include numbers along axes only for bottom left plot of group (a 'group' is an analysis of identical markers).
- ☒ All plots are contour plots with outliers or pseudocolor plots.
- ☒ A numerical value for number of cells or percentage (with statistics) is provided.

## Methodology

Sample preparation

After heparinizing mice, 500  $\mu$ l of blood was collected into an anticoagulant tube to deplete red blood cells using a lysis solution. The remaining cells were resuspended in 1X HBSS containing 5% BSA. EGFP and mSCARLET-labeled tumor cells were analyzed using GFP and RFP channels, respectively in LSRFortessa X-20 by the UCSD Embryonic Core. The FlowJo software was used for final data processing.

Instrument

LSRFortessa X-20

Software

BDFACSDiva (v9.0), Flow Jo(v10.6.1)

Cell population abundance

No cell sorting were performed in this study.

Gating strategy

For all experiments cell debris were excluded with FSC-A/SSC-A gates and doublets were excluded with FSC-A/FSC-H. Dead cell exclusion (DAPI or 7 AAD negative population) was performed when appropriate. Positive staining was determined based on FMO and single stains for each experiment

☐ Tick this box to confirm that a figure exemplifying the gating strategy is provided in the Supplementary Information.
